# Supplementary material for: Golimumab 3-year safety update: an analysis of pooled data from the long-term extensions of randomised, double-blind, placebo-controlled trials conducted in patients with rheumatoid arthritis, psoriatic arthritis or ankylosing spondylitis
Source: PubMed Central journal article supplement — Ann Rheum Dis. 2013 Dec 16;74(3):538–46. doi: 10.1136/annrheumdis-2013-204195 (PMC4345908; doi:10.1136/annrheumdis-2013-204195), 2013-12-16
Supplement: annrheumdis-2013-204195-s1.pdf [file annrheumdis-2013-204195-s1.pdf]

## ONLINE SUPPLEMENT

### Patients and Methods

In the GO-BEFORE, GO-FORWARD, and GO-AFTER studies, study participants were adults ( $\geq 18$  years) who had active (i.e., at least 4 swollen and 4 tender joints) rheumatoid arthritis (RA) according to the revised 1987 American College of Rheumatology (ACR; formerly, the American Rheumatism Association) classification criteria[44] for  $\geq 3$  months before the initial administration of study agent. In GO-BEFORE, RA patients could not have received  $>3$  weekly doses of oral methotrexate (MTX) for RA. In the Phase 2b and GO-FORWARD trials, RA patients must have been receiving methotrexate ( $\geq 10$  or 15–25 mg/week, respectively) for  $\geq 3$  months, with the dose being stable for  $\geq 4$  weeks before the start of study treatment. In GO-AFTER, RA patients must have received  $\geq 1$  dose of an anti-TNF agent (etanercept, adalimumab, or infliximab), the last dose of which must have been given  $\geq 8$  weeks (adalimumab or etanercept) or  $\geq 12$  weeks (infliximab) before initiating study treatment.

Patients in the GO-REVEAL study were adults who had active psoriatic arthritis (PsA), defined by the presence of  $\geq 3$  swollen and  $\geq 3$  tender joints, despite treatment with disease-modifying antirheumatic drugs (DMARDs) or nonsteroidal anti-inflammatory drugs (NSAIDs); the absence of circulating rheumatoid factor; and the presence of a qualifying plaque psoriasis lesion  $\geq 2$  cm in diameter. Stable doses of MTX ( $\leq 25$ mg/week) were allowed but not required. Patients in the GO-RAISE study were adults who had ankylosing spondylitis AS (diagnosed according to the modified New York Criteria[45]), a Bath AS Disease Activity Index[46] score  $\geq 4$ , a spinal pain assessment score  $\geq 4$ , and an inadequate response to NSAIDs and/or DMARDs.

In all trials, eligible patients met the prespecified tuberculosis (TB) screening criteria. Patients with positive TB skin (per local criteria) and/or whole blood interferon-based QuantiFERON<sup>®</sup>-TB Gold-In-Tube (QFT; Cellestis; Valencia, CA) testing results could participate, but had to begin treatment for latent TB before or simultaneously with the first administration of study agent.

### **Data collection and analyses**

In the Phase 3 studies, patients could cross over from placebo to golimumab 50 mg or increase the golimumab dose from 50 mg to 100 mg in cases of inadequate response. Thus, a single patient with  $\geq 1$  adverse event (AE) may contribute data to  $\geq 1$  treatment column; each AE is attributed to the dose that the patient was receiving at the time of the event. Serum samples from patients who developed injection-site reactions were tested for the presence of antibodies to golimumab.[47] Clinically significant abnormal laboratory values were recorded as AEs; criteria prespecified by the sponsor and consistent across the trials identified laboratory values considered markedly abnormal.

The occurrences of AEs, serious adverse events, study agent discontinuation due to AEs, infections, injection-site reactions, and predefined hepatobiliary AEs (i.e., alanine aminotransferase level  $\geq 3$  times the upper limit of normal [ULN] in combination with either bilirubin level  $\geq 2$  times ULN or an AE within the hepatobiliary system-organ class of the MedDRA dictionary that was classified as serious by the investigator in accordance with regulatory guidelines) are summarized for patients in the Phase 3 trials with  $\geq 1$  event. For the rare events of death, serious infection, tuberculosis, opportunistic infection, demyelinating disorder, and malignancy, incidence rates were calculated as the number of events per

100 patient-years (/pt-yrs) of follow up, along with the corresponding exact 95% confidence intervals (CIs); data from the aforementioned Phase 2b RA trial were also included. Each infection for an individual patient was counted separately. For malignancies, other than non-melanoma skin cancer, incidences were compared with those derived from an age-, gender- and race-matched population from the 2007 US National Cancer Institute Surveillance, Epidemiology, and End Results (SEER) database.[48] Standardized incidence ratios with 95% CIs were calculated by dividing the observed number (of events in the golimumab trials) by the expected number (of events from the SEER database).

**Table S1. Safety events through week 160 by indication: pooled data from Phase 2b and Phase 3 studies of SC golimumab in rheumatological indications (RA, PsA, AS).**

|                                                | Rheumatoid arthritis |                             |                              | Psoriatic arthritis   |                             |                              | Ankylosing spondylitis |                             |                              |
|------------------------------------------------|----------------------|-----------------------------|------------------------------|-----------------------|-----------------------------|------------------------------|------------------------|-----------------------------|------------------------------|
|                                                | Placebo ±<br>MTX     | Golimumab<br>50 mg ±<br>MTX | Golimumab<br>100 mg ±<br>MTX | Placebo<br>±MTX       | Golimumab<br>50 mg ±<br>MTX | Golimumab<br>100 mg ±<br>MTX | Placebo<br>±MTX        | Golimumab<br>50 mg ±<br>MTX | Golimumab<br>100 mg ±<br>MTX |
| <b>Number of treated patients<sup>1</sup></b>  | 449                  | 788                         | 1062                         | 113                   | 248                         | 248                          | 77                     | 213                         | 191                          |
| <b>Any adverse event, n (%)</b>                | 341 (75.9)           | 671 (85.2)                  | 933 (87.9)                   | 69 (61.1)             | 198 (79.8)                  | 195 (78.6)                   | 60 (77.9)              | 200 (93.9)                  | 174 (91.1)                   |
| <b>Most common system-organ classes</b>        |                      |                             |                              |                       |                             |                              |                        |                             |                              |
| Infection                                      | 167 (37.2)           | 467 (59.3)                  | 689 (64.9)                   | 29 (25.7)             | 143 (57.7)                  | 146 (58.9)                   | 25 (32.5)              | 144 (67.6)                  | 130 (68.1)                   |
| Musculoskeletal disorder                       | 95 (21.2)            | 249 (31.6)                  | 424 (39.9)                   | 18 (15.9)             | 70 (28.2)                   | 78 (31.5)                    | 20 (26.0)              | 95 (44.6)                   | 95 (49.7)                    |
| General disorder                               | 71 (15.8)            | 161 (20.4)                  | 299 (28.2)                   | 14 (12.4)             | 56 (22.6)                   | 46 (18.5)                    | 10 (13.0)              | 78 (36.6)                   | 76 (39.8)                    |
| Skin disorder                                  | 73 (16.3)            | 158 (20.1)                  | 279 (26.3)                   | 16 (14.2)             | 58 (23.4)                   | 47 (19.0)                    | 9 (11.7)               | 68 (31.9)                   | 60 (31.4)                    |
| Gastrointestinal disorder                      | 127 (28.3)           | 278 (35.3)                  | 400 (37.7)                   | 19 (6.8)              | 69 (27.8)                   | 63 (25.4)                    | 17 (22.1)              | 88 (41.3)                   | 90 (47.1)                    |
| Injury                                         | 39 (8.7)             | 143 (18.1)                  | 227 (21.4)                   | 8 (7.1)               | 48 (19.4)                   | 56 (22.6)                    | 6 (7.8)                | 39 (18.3)                   | 46 (24.1)                    |
| Nervous disorder                               | 51 (11.4)            | 147 (18.7)                  | 244 (23.0)                   | 12 (10.6)             | 47 (19.0)                   | 41 (16.5)                    | 6 (7.8)                | 69 (32.4)                   | 65 (34.0)                    |
| <b>Any serious adverse event, n (%)</b>        | 43 (9.6)             | 146 (18.5)                  | 269 (25.3)                   | 8 (7.1)               | 23 (9.3)                    | 27 (10.9)                    | 6 (7.8)                | 23 (10.8)                   | 29 (15.2)                    |
| <b>Most common system-organ classes</b>        |                      |                             |                              |                       |                             |                              |                        |                             |                              |
| Infection                                      | 11 (2.4)             | 39 (4.9)                    | 101 (9.5)                    | 5 (4.4)               | 3 (1.2)                     | 5 (2.0)                      | 1 (1.3)                | 6 (2.8)                     | 11 (5.8)                     |
| Musculoskeletal disorder                       | 9 (2.0)              | 24 (3.0)                    | 62 (5.8)                     | 0 (0.0)               | 0 (0.0)                     | 6 (2.4)                      | 0 (0.0)                | 5 (2.3)                     | 6 (3.1)                      |
| Neoplasm                                       | 6 (1.3)              | 24 (3.0)                    | 29 (2.7)                     | 0 (0.0)               | 5 (2.0)                     | 2 (0.8)                      | 1 (1.3)                | 1 (0.5)                     | 0 (0.0)                      |
| Injury                                         | 6 (1.3)              | 14 (1.8)                    | 29 (2.7)                     | 0 (0.0)               | 2 (0.8)                     | 3 (1.2)                      | 1 (1.3)                | 5 (2.3)                     | 5 (2.6)                      |
| Cardiac disorder                               | 3 (0.7)              | 12 (1.5)                    | 19 (1.8)                     | 1 (0.9)               | 2 (0.8)                     | 4 (1.6)                      | 0 (0.0)                | 1 (0.5)                     | 2 (1.0)                      |
| Gastrointestinal disorder                      | 3 (0.7)              | 12 (1.5)                    | 26 (2.4)                     | 0 (0.0)               | 3 (1.2)                     | 3 (1.2)                      | 3 (3.9)                | 8 (3.8)                     | 2 (1.0)                      |
| <b>Number of treated patients<sup>2</sup></b>  | 484                  | 856                         | 1132                         | 113                   | 248                         | 248                          | 77                     | 213                         | 191                          |
| <b>Death, n (%)</b>                            | 1 (0.2)              | 5 (0.6)                     | 14 (1.2)                     | 0 (0.0)               | 2 (0.8)                     | 0 (0.0)                      | 0 (0.0)                | 0 (0.0)                     | 0 (0.0)                      |
| Incidence per 100 pt-yrs (95% CI)              | 0.35<br>(0.01, 1.95) | 0.37<br>(0.12, 0.86)        | 0.58<br>(0.32, 0.98)         | 0.00<br>(0.00, 7.04)  | 0.41<br>(0.05, 1.50)        | 0.00<br>(0.00, 0.53)         | 0.00<br>(0.00, 10.24)  | 0.00<br>(0.00, 0.63)        | 0.00<br>(0.00, 0.67)         |
| <b>Serious infection, n (%)</b>                | 12 (2.5)             | 46 (5.4)                    | 101 (8.9)                    | 4 (3.5)               | 4 (1.6)                     | 6 (2.4)                      | 1 (1.3)                | 7 (3.3)                     | 10 (5.2)                     |
| Incidence per 100 pt-yrs (95% CI)              | 4.90<br>(2.68, 8.22) | 4.28<br>(3.25, 5.54)        | 6.35<br>(5.38, 7.44)         | 9.41<br>(2.56, 24.08) | 0.83<br>(0.23, 2.12)        | 1.25<br>(0.50, 2.57)         | 3.42<br>(0.09, 19.05)  | 1.68<br>(0.73, 3.31)        | 3.14<br>(1.72, 5.27)         |
| <b>Tuberculosis, n (%)</b>                     | 0 (0.0)              | 4 (0.5)                     | 11 (1.0)                     | 0 (0.0)               | 0 (0.0)                     | 0 (0.0)                      | 0 (0.0)                | 0 (0.0)                     | 1 (0.5)                      |
| Incidence per 100 pt-yrs (95% CI)              | 0.00<br>(0.00, 1.05) | 0.30<br>(0.08, 0.76)        | 0.46<br>(0.23, 0.82)         | 0.00<br>(0.00, 7.04)  | 0.00<br>(0.00, 0.62)        | 0.00<br>(0.00, 0.53)         | 0.00<br>(0.00, 10.24)  | 0.00<br>(0.00, 0.63)        | 0.22<br>(0.01, 1.25)         |
| <b>Opportunistic infection, n (%)</b>          | 0 (0.0)              | 2 (0.2)                     | 6 (0.5)                      | 0 (0.0)               | 0 (0.0)                     | 2 (0.8)                      | 0 (0.0)                | 1 (0.5)                     | 0 (0.0)                      |
| Incidence per 100 pt-yrs (95% CI)              | 0.00<br>(0.00, 1.05) | 0.15<br>(0.02, 0.53)        | 0.25<br>(0.09, 0.55)         | 0.00<br>(0.00, 7.04)  | 0.00<br>(0.00, 0.62)        | 0.36<br>(0.04, 1.29)         | 0.00<br>(0.00, 10.24)  | 0.21<br>(0.01, 1.17)        | 0.00<br>(0.00, 0.67)         |
| <b>Malignancy, n (%)</b>                       | 6 (1.2)              | 22 (2.6)                    | 31 (2.7)                     | 0 (0.0)               | 6 (2.4)                     | 5 (2.0)                      | 1 (1.3)                | 1 (0.5)                     | 2 (1.0)                      |
| Incidence per 100 pt-yrs (95% CI)              | 2.11<br>(0.77, 4.59) | 1.64<br>(1.03, 2.48)        | 1.31<br>(0.89, 1.86)         | 0.00<br>(0.00, 7.04)  | 1.25<br>(0.46, 2.72)        | 0.89<br>(0.29, 2.08)         | 3.44<br>(0.09, 19.14)  | 0.21<br>(0.01, 1.17)        | 0.45<br>(0.05, 1.63)         |
| SIR (95% CI) versus SEER database <sup>3</sup> | 1.09                 | 1.64                        | 1.15                         | 0.00                  | 1.30                        | 0.64                         | 0.00                   | 0.70                        | 0.00                         |

|                                      |               |              |               |                |               |               |                |               |               |
|--------------------------------------|---------------|--------------|---------------|----------------|---------------|---------------|----------------|---------------|---------------|
|                                      | (0.13, 3.92)  | (0.92, 2.71) | (0.68, 1.81)  | (0.00, 14.57)  | (0.27, 3.81)  | (0.08, 2.32)  | (0.00, 32.82)  | (0.02, 3.89)  | (0.00, 2.19)  |
| <b>Lymphoma, n (%)</b>               | 0 (0.0)       | 0 (0.0)      | 6 (0.5)       | 0 (0.0)        | 0 (0.0)       | 0 (0.0)       | 0 (0.0)        | 1 (0.5)       | 0 (0.0)       |
| Incidence per 100 pt-yrs (95% CI)    | 0.00          | 0.00         | 0.25          | 0.00           | 0.00          | 0.00          | 0.00           | 0.21          | 0.00          |
|                                      | (0.00, 1.05)  | (0.00, 0.22) | (0.09, 0.55)  | (0.00, 7.04)   | (0.00, 0.62)  | (0.00, 0.53)  | (0.00, 10.24)  | (0.01, 1.17)  | (0.00, 0.67)  |
| SIR (95% CI) versus SEER database    | 0.00          | 0.00         | 8.98          | 0.00           | 0.00          | 0.00          | 0.00           | 11.97         | 0.00          |
|                                      | (0.00, 38.33) | (0.00, 7.81) | (3.30, 19.55) | (0.00, 291.44) | (0.00, 25.76) | (0.00, 19.68) | (0.00, 571.98) | (0.30, 66.71) | (0.00, 38.96) |
| <b>Demyelinating disorder, n (%)</b> | 0 (0.0)       | 0 (0.0)      | 3 (0.3)       | 0 (0.0)        | 0 (0.0)       | 0 (0.0)       | 0 (0.0)        | 0 (0.0)       | 0 (0.0)       |
| Incidence per 100 pt-yrs (95% CI)    | 0.00          | 0.00         | 0.17          | 0.00           | 0.00          | 0.00          | 0.00           | 0.00          | 0.00          |
|                                      | (0.00, 1.05)  | (0.00, 0.22) | (0.05, 0.43)  | (0.00, 7.04)   | (0.00, 0.62)  | (0.00, 0.53)  | (0.00, 10.24)  | (0.00, 0.63)  | (0.00, 0.67)  |

<sup>1</sup> Patients may appear in  $\geq 1$  treatment column. For 'Any adverse event' and 'Any serious adverse event', only the 5 Phase 3 trials are included.

<sup>2</sup> Patients may appear in  $\geq 1$  treatment column. For rare adverse events, the Phase 2b and Phase 3 trials are included.

<sup>3</sup> Excluding nonmelanoma skin cancer.

AS – ankylosing spondylitis, CI – confidence interval, MTX – methotrexate, PsA – psoriatic arthritis, pt-yrs – patient-years, RA – rheumatoid arthritis, SC – subcutaneous, SEER – Surveillance, Epidemiology and End Results, SIR – standardized incidence ratio

**Table S2. Occurrence of infections through week 24 and through week 160 by use of oral corticosteroid use at baseline: pooled data from Phase 2b and Phase 3 studies of SC golimumab in rheumatological indications (RA, PsA, AS).**

|                                                                       | Placebo ± MTX           | Golimumab<br>50 mg ± MTX | Golimumab<br>100 mg ± MTX |
|-----------------------------------------------------------------------|-------------------------|--------------------------|---------------------------|
| <b>INFECTIONS THROUGH WEEK 24</b>                                     |                         |                          |                           |
| <b>Patients <u>with</u> oral corticosteroid use at baseline, n</b>    | 306                     | 567                      | 432                       |
| -All infections - Incidence per 100 pt-yrs (95% CI)                   | 92.55 (75.78, 111.94)   | 94.38 (78.06, 113.12)    | 82.81 (70.86, 96.19)      |
| -Serious infections - Incidence per 100 pt-yrs (95% CI)               | 7.11 (3.41, 13.07)      | 4.52 (1.82, 9.31)        | 6.26 (3.58, 10.16)        |
| -Opportunistic infections - Incidence per 100 pt-yrs (95% CI)         | 0.00 (0.00, 2.11)       | 0.00 (0.00, 1.92)        | 0.00 (0.00, 1.15)         |
| <b>Patients <u>without</u> oral corticosteroid use at baseline, n</b> | 364                     | 742                      | 853                       |
| -All infections - Incidence per 100 pt-yrs (95% CI)                   | 100.54 (84.12, 119.23)  | 107.52 (92.10, 124.79)   | 120.81 (106.95, 135.96)   |
| -Serious infections - Incidence per 100 pt-yrs (95% CI)               | 4.16 (1.67, 8.57)       | 2.41 (0.78, 5.61)        | 3.53 (1.76, 6.31)         |
| -Opportunistic infections - Incidence per 100 pt-yrs (95% CI)         | 0.00 (0.00, 1.77)       | 0.00 (0.00, 1.44)        | 0.32 (0.01, 1.77)         |
| <b>INFECTIONS THROUGH WEEK 160</b>                                    |                         |                          |                           |
| <b>Patients <u>with</u> oral corticosteroid use at baseline, n</b>    | 306                     | 567                      | 432                       |
| -All infections - Incidence per 100 pt-yrs (95% CI)                   | 116.88 (100.89, 134.68) | 92.25 (86.26, 98.54)     | 87.00 (82.32, 91.87)      |
| -Serious infections - Incidence per 100 pt-yrs (95% CI)               | 7.34 (3.79, 12.83)      | 4.29 (3.08, 5.82)        | 7.39 (6.07, 8.91)         |
| -Opportunistic infections - Incidence per 100 pt-yrs (95% CI)         | 0.00 (0.00, 1.83)       | 0.10 (0.00, 0.58)        | 0.20 (0.04, 0.59)         |
| <b>Patients <u>without</u> oral corticosteroid use at baseline, n</b> | 364                     | 742                      | 853                       |
| -All infections - Incidence per 100 pt-yrs (95% CI)                   | 123.06 (107.89, 139.77) | 102.89 (97.54, 108.46)   | 102.31 (97.78, 107.00)    |
| -Serious infections - Incidence per 100 pt-yrs (95% CI)               | 3.63 (1.46, 7.49)       | 2.16 (1.44, 3.10)        | 3.25 (2.49, 4.18)         |
| -Opportunistic infections - Incidence per 100 pt-yrs (95% CI)         | 0.00 (0.00, 1.56)       | 0.15 (0.02, 0.54)        | 0.27 (0.09, 0.62)         |

AS – ankylosing spondylitis, CI – confidence interval, MTX – methotrexate, PsA – psoriatic arthritis, pt-yrs – patient-years, RA – rheumatoid arthritis, SC – subcutaneous
